# Supplementary material for: Promoting mitochondrial dynamics by inhibiting the PINK1–PRKN pathway to relieve diabetic nephropathy
Source: PubMed Central journal article supplement (PMC11095637; doi:10.1242/dmm.050471), 2024-05-01
Supplement: dmm-17-050471-s1.pdf [file dmm-17-050471-s1.pdf]

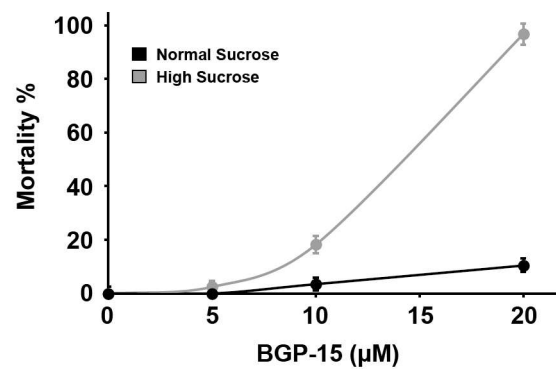

**Fig. S1. Dosage-lethality curve for BGP-15 treatment in *Drosophila***

On the X-axis, concentration of BGP-15 in µM; on the Y-axis the percent mortality for normal diet and high-sucrose treated flies (Dot>mito-GFP). n = 4 biological repeats (~50 flies/vial).
